# Supplementary material for: Inactivation of myostatin by photooxygenation using functionalized d-peptides
Source: Royal Society of Chemistry journal article supplement (doi:10.1039/d2md00425a), 2023-01-01
Supplement: d2md00425a1.pdf [file d2md00425a1.pdf]

## Electronic Supplementary Information for:

### **Inactivation of myostatin by photooxygenation using functionalized D-peptides**

Hideyuki Okamoto<sup>1</sup>, Shuko Amber Murano<sup>1</sup>, Kaoru Ikekawa<sup>1</sup>, Masahiro Katsuyama<sup>1</sup>, Sho Konno<sup>1</sup>, Akihiro Taguchi<sup>1</sup>, Kentaro Takayama<sup>1,2</sup>, Atsuhiko Taniguchi<sup>\*,1</sup> and Yoshio Hayashi<sup>\*,1</sup>

<sup>1</sup>Department of Medicinal Chemistry, School of Pharmacy, Tokyo University of Pharmacy and Life Sciences, Tokyo 192-0392, Japan.

<sup>2</sup>Department of Environmental Biochemistry, Kyoto Pharmaceutical University, Yamashina-ku, Kyoto 607-8414, Japan.

## Table of Contents

|                                    |    |
|------------------------------------|----|
| General procedures .....           | S3 |
| Synthesis .....                    | S3 |
| Photooxygenation .....             | S5 |
| Luciferase-reporter assay .....    | S6 |
| Phototoxicity assay .....          | S6 |
| Stability assay with enzymes ..... | S7 |
| References .....                   | S7 |

## Table of Figures

|                 |     |
|-----------------|-----|
| Scheme S1 ..... | S8  |
| Fig. S1 .....   | S9  |
| Fig. S2 .....   | S10 |
| Fig. S3 .....   | S11 |
| Fig. S4 .....   | S12 |
| Fig. S5 .....   | S13 |

## General procedures

Myostatin was purchased from Wako Pure Chemical Industries, Ltd (Osaka, Japan). A $\beta$ 1–42 isopeptide, which contains an ester structure between the Gly25–Ser26 sequence, converts to intact A $\beta$ 1–42 *in situ* at neutral pH through an O-to-N intramolecular acyl migration ( $t_{1/2}$  ~10 s),<sup>S1,S2</sup> was purchased from Peptide Institute, Inc. (Osaka, Japan). Methylene blue was purchased from Nacalai Tesque, Inc. (Kyoto, Japan). Other reagents and solvents were purchased from Kanto Chemical Co., Inc. (Tokyo, Japan), Nacalai Tesque, Inc., Peptide Institute, Inc., Sigma-Aldrich Co. LLC (St Louis, MO, USA), Tokyo Chemical Industries Co., Ltd (Tokyo, Japan), Wako Pure Chemical Industries, Ltd, and Watanabe Chemical Industries, Ltd (Hiroshima, Japan). All chemicals were used as received. Analytical HPLC was carried out on a reverse-phase column (Nacalai Tesque COSMOSIL 5C18-AR-II, 4.6ID  $\times$  150 mm) using a linear gradient of CH<sub>3</sub>CN (5–85%, 40 min) in 0.1% aqueous trifluoroacetic acid (TFA) with a flow rate of 1.0 mL min<sup>-1</sup>, and detected at 230 or 200–800 nm. Preparative HPLC was carried out on a reverse-phase column (Waters SunFire Prep C18 OBD, 19ID  $\times$  150 mm) using a linear gradient of 0.1% TFA/CH<sub>3</sub>CN in 0.1% aqueous TFA with a flow rate of 5.0 mL min<sup>-1</sup>, and detected by absorbance at 230 or 700 nm. MALDI-TOF MS spectra were recorded on Shimadzu Biotech AXIMA Assurance using  $\alpha$ -cyano-4-hydroxy cinnamic acid as a matrix. HRMS spectra were recorded on Waters MICRO MASS LCT premier. Absorbance measurements were performed using a Shimadzu UV-1700 UV-visible spectrophotometer with a rectangular quartz cell (10 mm path-length). CD measurements were performed using a Jasco J-1500CD spectrometer (JASCO, Japan) with a quartz cell (5 mm path-length).

## Synthesis

Peptide **2**. Fmoc-based solid-phase peptide synthesis (SPPS) was performed with similar manner to that described by Takayama *et al.*<sup>S3</sup> On an Fmoc-NH SAL resin (108 mg, 0.04 mmol), Fmoc-amino acids (0.20 mmol each) were sequentially coupled using the *N,N'*-diisopropylcarbodiimide (DIPCI, 0.20 mmol)/1-hydroxybenzotriazole (HOBt, 0.20 mmol) method for 3 h in DMF after removing each Fmoc group with 20% piperidine/DMF for 10  $\times$  2 min. The obtained protected peptide-bound resin was treated with TFA/*m*-cresol/thioanisole/1,2-ethanedithiol (100:2.5:2.5:1 v:v:v:v) for 2.5 h, filtered, concentrated, precipitated with diethyl ether, and purified by preparative HPLC in a 0.1% aqueous TFA–CH<sub>3</sub>CN system to obtain peptide **2** as a TFA salt (white amorphous, 44 mg, 37%).

LRMS(MALDI)  $m/z$  [M+H]<sup>+</sup> found 2311.5 (calcd. for C<sub>123</sub>H<sub>192</sub>N<sub>32</sub>O<sub>18</sub> 2311.5); purity >95% (analytical HPLC,  $t_R$  = 22.8 min).

Peptide **3**. To a solution of **8** (10 mM, 180  $\mu$ L, 1 eq.), **13**<sup>S4</sup> (11 mM, 360  $\mu$ L, 2.2 eq.) and L-

ascorbic acid (120 mM, 360  $\mu$ L, 24 eq.) in DMF/MeOH (1:1 v:v, 1.8 mL), tetrakis(acetonitrile) copper(I) hexafluorophosphate (3.1 mg, 4.6 eq.) was added. The solution was stirred at room temperature (RT) for 20 min then purified by preparative HPLC in a 0.1% aqueous TFA–CH<sub>3</sub>CN system to obtain peptide **3** as a TFA salt (dark blue amorphous, 2.3 mg, 36%). HRMS  $m/z$  [M+H]<sup>+</sup> found 3062.6755 (calcd. for C<sub>154</sub>H<sub>223</sub>N<sub>36</sub>O<sub>20</sub>BrBF<sub>4</sub> 3062.6752); purity >95% (analytical HPLC,  $t_R$  = 26.3 min).

Peptide **4**. Following the same procedure used for peptide **3**, **9** (10 mM, 90  $\mu$ L, 1 eq.) and **13** (11 mM, 90  $\mu$ L, 1.1 eq.) was afforded **4** as a dark blue amorphous TFA salt (0.5 mg, 16%). HRMS  $m/z$  [M+H]<sup>+</sup> found 2949.5952 (calcd. for C<sub>148</sub>H<sub>212</sub>N<sub>35</sub>O<sub>19</sub>BrBF<sub>4</sub> 2949.5911); purity >95% (analytical HPLC,  $t_R$  = 26.4 min).

Peptide **5**. Following the same procedure used for peptide **3**, **10** (10 mM, 90  $\mu$ L, 1 eq.) and **13** (11 mM, 180  $\mu$ L, 2.2 eq.) was afforded **5** as a dark blue amorphous TFA salt (0.9 mg, 26%). HRMS  $m/z$  [M+H]<sup>+</sup> found 2921.5811 (calcd. for C<sub>148</sub>H<sub>212</sub>N<sub>33</sub>O<sub>19</sub>BrBF<sub>4</sub> 2921.5850); purity >95% (analytical HPLC,  $t_R$  = 26.6 min).

Peptide **6**. Following the same procedure used for peptide **3**, **11** (10 mM, 145  $\mu$ L, 1 eq.) and **13** (11 mM, 290  $\mu$ L, 2.7 eq.) was afforded **6** as a dark blue amorphous TFA salt (2.8 mg, 53%). HRMS  $m/z$  [M+H]<sup>+</sup> found 2921.5886 (calcd. For C<sub>148</sub>H<sub>212</sub>N<sub>33</sub>O<sub>19</sub>BrBF<sub>4</sub> 2921.5850); purity >95% (analytical HPLC,  $t_R$  = 27.7 min).

Peptide **7**. Following the same procedure used for peptide **3**, **12** (10 mM, 90  $\mu$ L, 1 eq.) and **13** (11 mM, 180  $\mu$ L, 2.2 eq.) was afforded **7** as a dark blue amorphous TFA salt (0.5 mg, 14%). HRMS  $m/z$  [M+H]<sup>+</sup> found 3077.6870 (calcd. for C<sub>154</sub>H<sub>224</sub>N<sub>37</sub>O<sub>20</sub>BrBF<sub>4</sub> 3077.6861); purity >95% (analytical HPLC,  $t_R$  = 26.3 min).

Peptide **8**. On an Fmoc-NH SAL resin (200 mg, 0.07 mmol), Fmoc-amino acids and pent-4-ynoic acid (0.22 mmol each) were sequentially coupled using the DIPCI (0.22 mmol)/HOBt (0.22 mmol) method for 1.5 h in DMF after removing each Fmoc group with 20% piperidine/DMF for 10  $\times$  2 min. The obtained protected peptide-bound resin was treated with TFA/1,3-dimethoxybenzene<sup>S5</sup>/triisopropylsilane (92.5:5:2.5 v:v:v) for 90 min, filtered, concentrated, precipitated with diethyl ether, and purified by preparative HPLC in a 0.1%

aqueous TFA–CH<sub>3</sub>CN system to obtain peptide **8** as a TFA salt (white amorphous, 33 mg, 29%).

LRMS(MALDI) *m/z* [M+H]<sup>+</sup> found 2392.6 (calcd. for C<sub>123</sub>H<sub>192</sub>N<sub>32</sub>O<sub>18</sub> 2393.1); purity >95% (analytical HPLC, t<sub>R</sub> = 18.7 min).

Peptide **9**. Following the same procedure used for peptide **8**, on an Fmoc-NH SAL resin (101 mg, 0.04 mmol), Fmoc-amino acids and 3,3-diphenylpropionic acid (0.20 mmol each) afforded **9** as a white amorphous TFA salt (2.3 mg, 11%).

LRMS(MALDI) *m/z* [M+H]<sup>+</sup> found 2279.7 (calcd for C<sub>117</sub>H<sub>181</sub>N<sub>30</sub>O<sub>17</sub> 2279.9); purity >95% (analytical HPLC, t<sub>R</sub> = 20.0 min).

Peptide **10**. Following the same procedure used for peptide **8**, on an Fmoc-NH SAL resin (103 mg, 0.05 mmol), Fmoc-amino acids and 3,3-diphenylpropionic acid (0.20 mmol each) afforded **10** as a white amorphous TFA salt (8.1 mg, 20%).

LRMS(MALDI) *m/z* [M+H]<sup>+</sup> found 2251.4 (calcd. for C<sub>117</sub>H<sub>181</sub>N<sub>28</sub>O<sub>17</sub> 2251.9); purity >95% (analytical HPLC, t<sub>R</sub> = 19.6 min).

Peptide **11**. Following the same procedure used for peptide **8**, on an Fmoc-NH SAL resin (99 mg, 0.04 mmol), Fmoc-amino acids and 3,3-diphenylpropionic acid (0.20 mmol each) afforded **11** as a white amorphous TFA salt (11 mg, 28%).

LRMS(MALDI) *m/z* [M+H]<sup>+</sup> found 2251.9 (calcd. for C<sub>117</sub>H<sub>181</sub>N<sub>28</sub>O<sub>17</sub> 2252.6); purity >95% (analytical HPLC, t<sub>R</sub> = 20.0 min).

Peptide **12**. Following the same procedure used for peptide **8**, on an Fmoc-NH SAL resin (104 mg, 0.05 mmol), Fmoc-amino acids and 3,3-diphenylpropionic acid (0.20 mmol each) afforded **12** as a white amorphous TFA salt (7.5 mg, 25%).

LRMS(MALDI) *m/z* [M+H]<sup>+</sup> found 2408.1 (calcd. for C<sub>117</sub>H<sub>181</sub>N<sub>28</sub>O<sub>17</sub> 2408.6); purity >95% (analytical HPLC, t<sub>R</sub> = 20.1 min).

### Photooxygenation

The photooxygenation study was similar to that described by Okamoto *et al.*<sup>S4,S6</sup> A stock solution of myostatin (8 μM in 1 mM aqueous HCl) was diluted with 1 mM aqueous HCl and 20 mM phosphate buffer (pH 7.4) to produce 1 μM myostatin (10 mM phosphate, pH 7.4). A stock solution of Aβ<sub>1-42</sub> isopeptide (250 μM in 0.1% aqueous TFA, ultracentrifuged)<sup>S2</sup> was diluted with water and 20 mM phosphate buffer (pH 7.4) to 20 μM Aβ<sub>1-42</sub> (10 mM phosphate, pH 7.4). To each solution, functionalized peptide **3–7** or methylene blue (50 μM in

CH<sub>3</sub>CN/DMSO = 9/1) was added to the final concentration (3 or 1 μM, respectively) for the oxygenation studies. The mixture was irradiated with LED ISLM-150 × 150-FF ( $\lambda_{\text{max}} = 730$  nm, 14 mW; CCS Inc., Kyoto, Japan) at room temperature at approximately 3–5 cm from samples. The reaction mixtures were reduced with 1,4-dithiothreitol (50 mM) at 37 °C for 0.5 h, digested with endoproteinase Lys-C (1/20 of protein by weight) at 37 °C for 2.5 h, de-salted with ZipTip U-C18 (Millipore Co.), and analyzed using MALDI-TOF MS. For the comparison of oxygenation ratios based on the MS intensities, a comparative sample set was analyzed at one time, and the analytical conditions were standardized within the comparative sample set, for example, matrix substance, matrix/sample concentrations, solvent, laser power and laser-shot number. For cell-based assay, the 10 mM phosphate-buffered solution containing myostatin (1 μM) or peptide **3–7** was diluted with serum-free DMEM (Dulbecco's modified Eagle's medium) to 0.6 nM myostatin, irradiated ( $\lambda_{\text{max}} = 730$  nm, 30 min), and then added to the cell culture.

#### **Luciferase-reporter assay**

The cell-culture and luciferase-reporter assay were performed as described by Okamoto *et al.*<sup>S4,S6</sup> HEK293 cells were cultured in DMEM (10% FBS, x1 non-essential amino acids) at 37 °C under 5% CO<sub>2</sub>. The cells were seeded at  $2.0 \times 10^4$  cells per well in the 96-well plate (Greiner Bio-One GmbH). After 24 h, transfection of reporter (pGL4.48[luc2P/SBE/Hygro], Promega) and control (pGL4.74[hRluc/TK], Promega) vectors was carried out using FuGENE HD (Promega) and Opti-MEM (Thermo Fisher Scientific) for 24 h. After the culture, medium was exchanged to serum- and phenol red-free DMEM, the cells were incubated for 8 h. After the medium was exchanged to each sample solution (0.6 nM myostatin), the cells were incubated for 4 h and then washed with PBS. The preparation of cell lysates and the measurement of luciferase reporter activities were conducted according to manufacturer's protocol of a Dual-Luciferase Reporter Assay System (Promega). Each experiment was carried out in triplicate. Values represent means  $\pm$  s.d. (n = 3). Statistical analyses were performed using Tukey's test.

#### **Phototoxicity assay**

The phototoxicity assay were performed as described by Okamoto *et al.*<sup>S6</sup> HEK293 cells, which were cultured in DMEM (10% FBS, x1 nonessential amino acids) at 37 °C under 5% CO<sub>2</sub>, were seeded at  $2.0 \times 10^4$  cells per well in the 96-well plate. After 48 h, the culture medium was exchanged with serum- and phenol red-free DMEM containing peptide **3–7** or methylene blue (3 μM). The cells were irradiated with LED ( $\lambda_{\text{max}} = 730$  nm, 30 min), and then incubated for 24 h. Cell viability was determined using WST-1 (Roche Ltd). Statistical

analysis was performed using Student's *t*-test.

### Stability assay with enzymes

Stability assay was performed with similar manner to that described by Takayama *et al.*<sup>S7</sup> Peptide **1** or **3** (100 µM) was incubated with chymotrypsin (5 µg/mL, from bovine pancreas, Thermo Fisher Scientific) or trypsin (5 µg/mL, from porcine pancreas, Wako Pure Chemical Industries, Ltd.) in Tris buffer (80 mM, pH 7.8) at 37 °C. After the incubation for 0, 1, or 3 h, 20 µL of the solution was subjected to analytical HPLC. The digested products were identified by MALDI-TOF MS analysis of the eluted solution in each peak. The residual ratio was calculated by comparing the corresponding peak areas of **1** or **3**.

### References

- S1. Y. Sohma, M. Sasaki, Y. Hayashi, T. Kimura and Y. Kiso, *Chem. Commun.*, 2004, 124–125.
- S2. A. Taniguchi, Y. Sohma, Y. Hirayama, H. Mukai, T. Kimura, Y. Hayashi, K. Matsuzaki and Y. Kiso, *ChemBioChem*, 2009, **10**, 710–715.
- S3. K. Takayama, K. Hitachi, H. Okamoto, M. Saitoh, M. Odagiri, R. Ohfusa, T. Shimada, A. Taguchi, A. Taniguchi, K. Tsuchida and Y. Hayashi, *ACS Med. Chem. Lett.*, 2022, **13**, 492–498.
- S4. H. Okamoto, A. Taniguchi, S. Usami, A. Taguchi, K. Takayama and Y. Hayashi, *Chem. Commun.*, 2019, **55**, 9108–9111.
- S5. P. Stathopoulos, S. Papas and V. Tsikaris, *J. Pept. Sci.*, 2006, **12**, 227–232.
- S6. H. Okamoto, A. Taniguchi, S. Usami, M. Katsuyama, S. Konno, A. Taguchi, K. Takayama and Y. Hayashi, *Org. Bio. Chem.*, 2021, **19**, 199–207.
- S7. K. Takayama, M. Odagiri, A. Taguchi, A. Taniguchi and Y. Hayashi, *Chem. Pharm. Bull.*, 2020, **68**, 512–515.
- S8. J. Reed and T. A. Reed, *Anal. Biochem.*, 1997, **254**, 36–40.

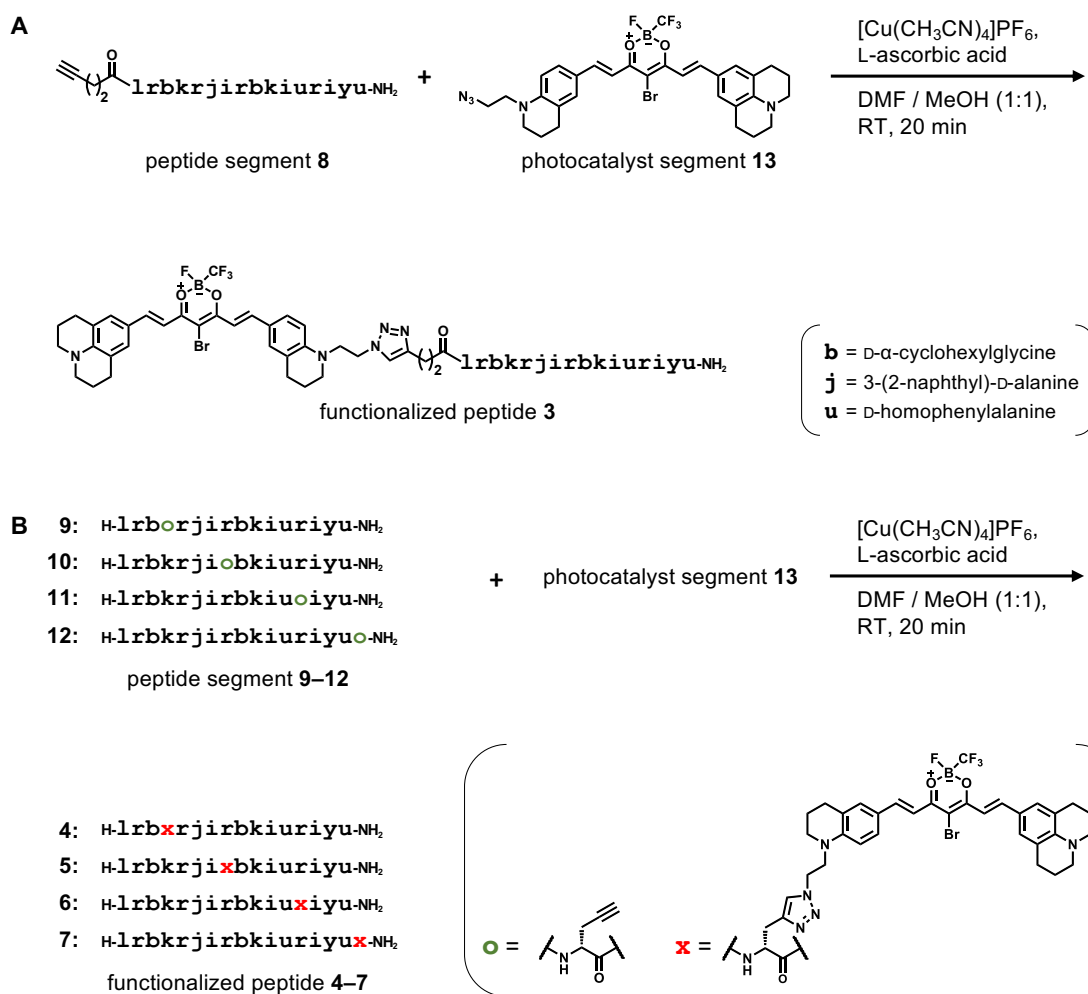

**Scheme S1** Synthesis of functionalized D-peptides **3–7**.



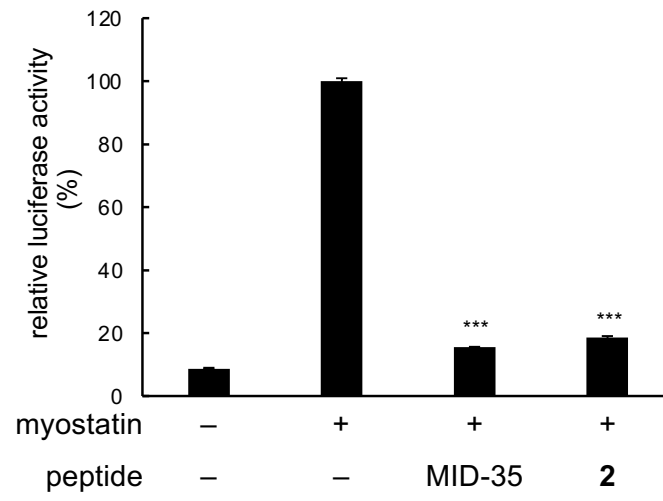

**Fig. S1** Myostatin inhibitory activity of MID-35 and D-peptide **2**. Peptide: 300 nM, myostatin: 0.6 nM, n = 3, means  $\pm$  s.d; \*\*\* $p$ <0.001 vs. myostatin alone by Tukey's test.

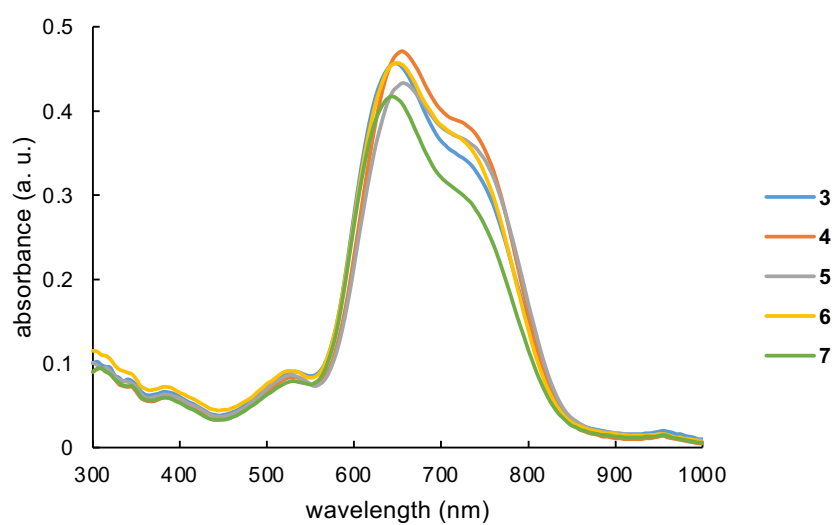

**Fig. S2** Absorption spectra of functionalized D-peptides **3–7**. A phosphate-buffered solution (10 mM, pH 7.4, 1% DMSO) containing **3–7** (10  $\mu$ M) was used for the measurements.

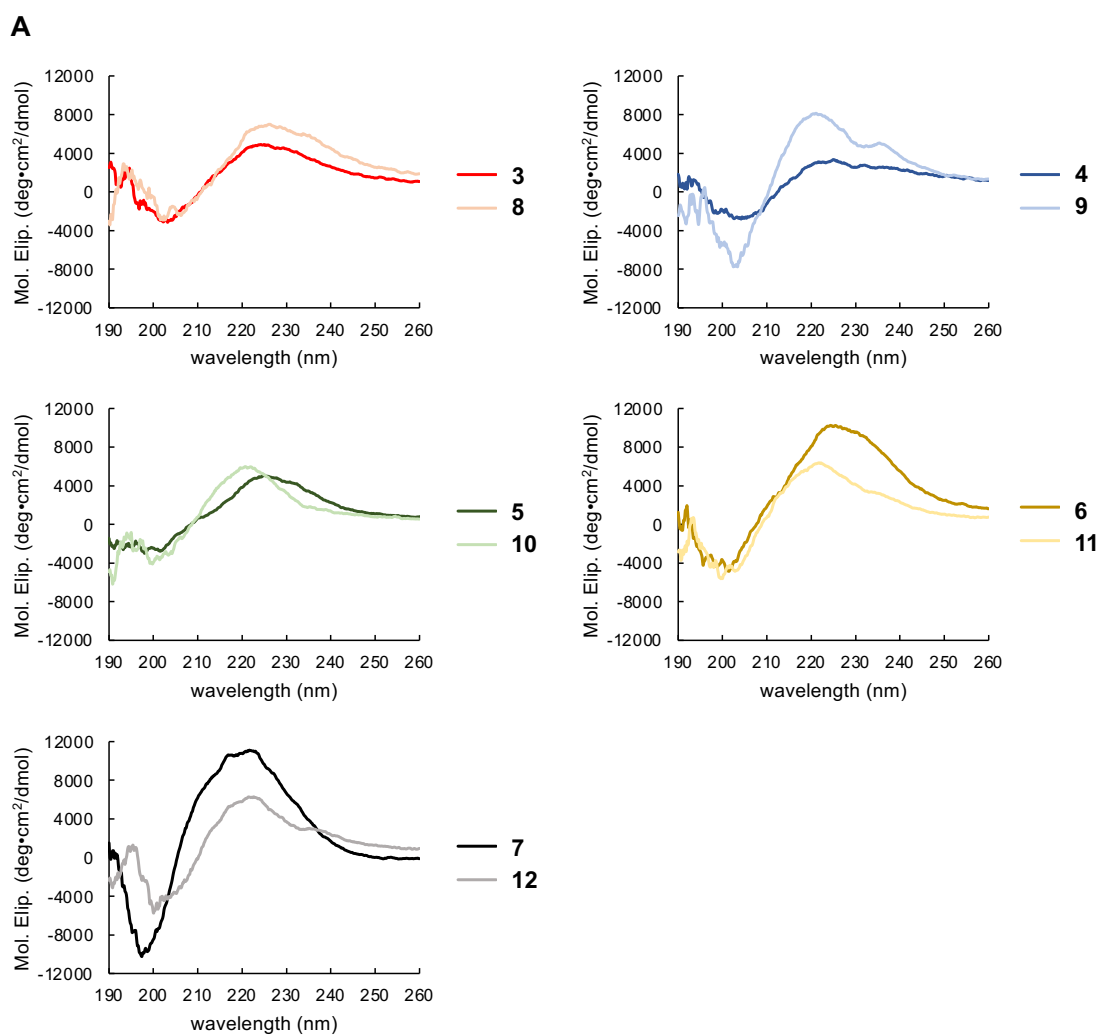

**B**

|                        |             | functionalized peptide |    |    |    |    | peptide segment |    |    |    |    |
|------------------------|-------------|------------------------|----|----|----|----|-----------------|----|----|----|----|
|                        |             | 3                      | 4  | 5  | 6  | 7  | 8               | 9  | 10 | 11 | 12 |
| structural content (%) | α-helix     | 0                      | 0  | 0  | 0  | 0  | 0               | 0  | 0  | 0  | 0  |
|                        | β-strand    | 45                     | 37 | 48 | 60 | 66 | 55              | 62 | 50 | 53 | 50 |
|                        | turn        | 9                      | 17 | 9  | 0  | 0  | 0               | 0  | 8  | 6  | 8  |
|                        | random coil | 46                     | 46 | 43 | 40 | 34 | 45              | 38 | 41 | 40 | 42 |

**Fig. S3** Secondary Structures of functionalized D-peptides **3–7** and peptide segments **8–12**. A) CD spectra and B) estimation of structural content (%) using Jasco secondary estimation software with Reed's reference set as reference spectra.<sup>S8</sup> A phosphate-buffered solution (10 mM, pH 7.4, 20% 2,2,2-trifluoroethanol) containing peptide (25 μM) was measured.

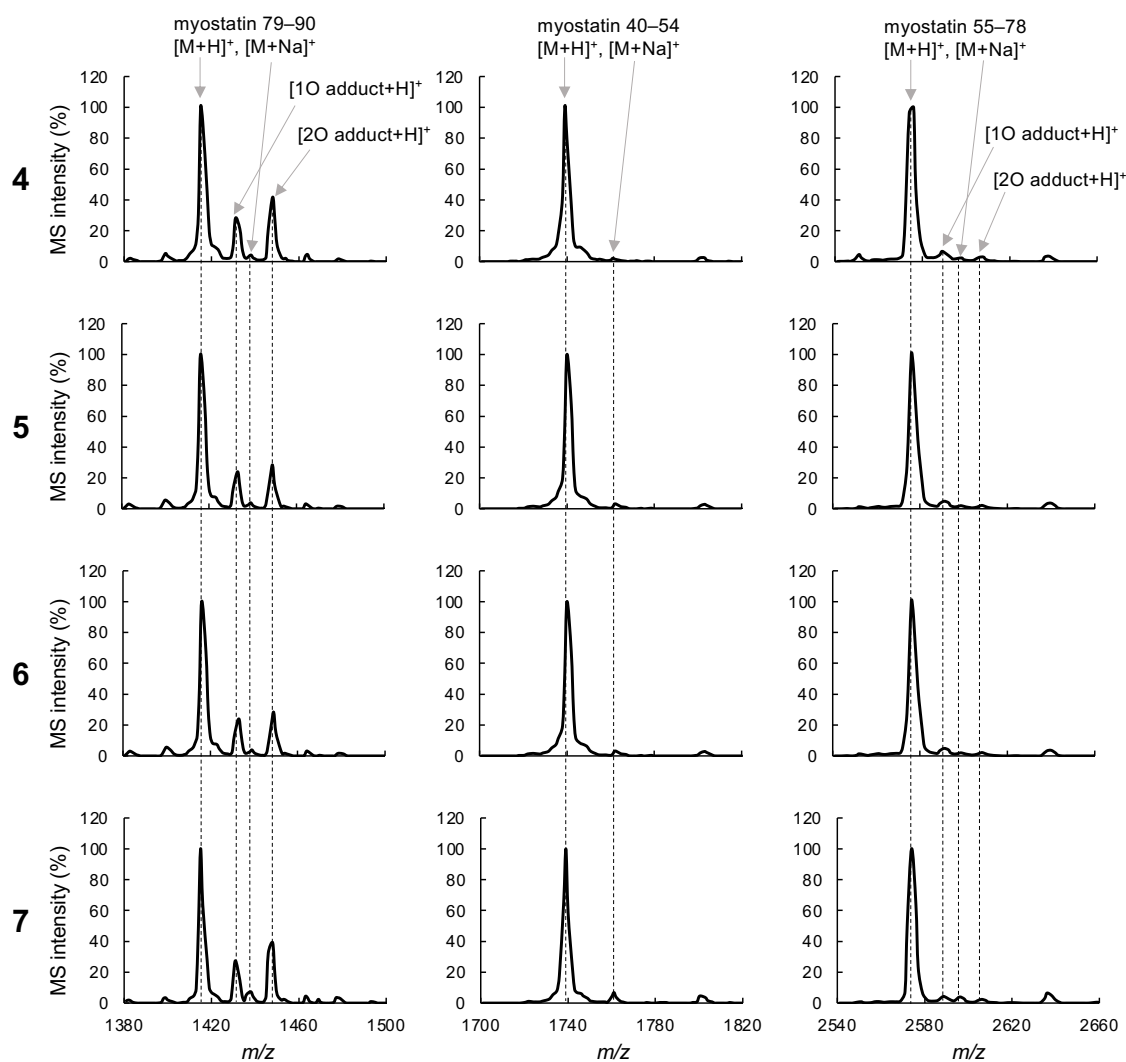

**Fig. S4** Photooxygenation of myostatin using functionalized D-peptides **4–7**. MS spectra of myostatin fragments 79–90, 40–54 and 55–78 which were obtained from myostatin after oxygenation. A phosphate-buffered solution (10 mM, pH 7.4) containing myostatin (1  $\mu$ M) and **4–7** (3  $\mu$ M) was irradiated ( $\lambda_{\text{max}} = 730$  nm) for 30 min, and then analyzed by MALDI-TOF MS following fragmentation of the myostatin.

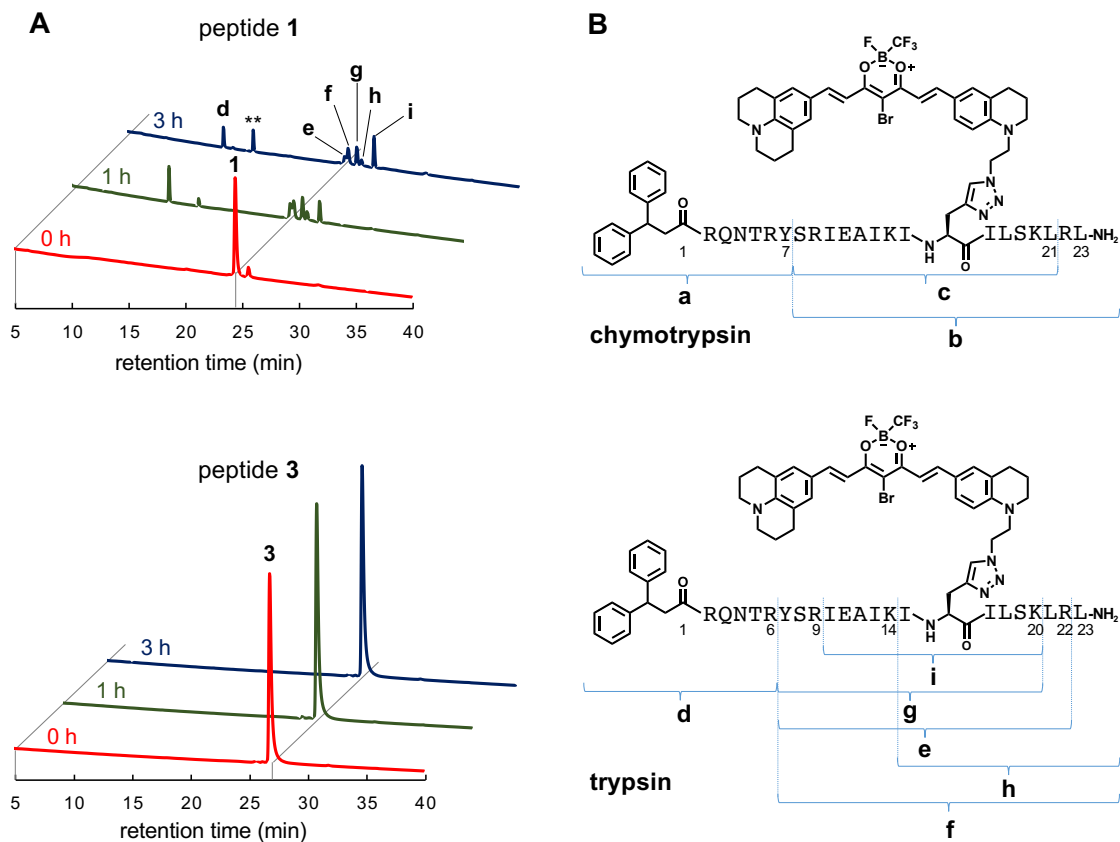

**Fig. S5** Stabilities of peptides **1** and **3**. A) HPLC chromatograms of **1** and **3** treated with trypsin. Although the peak of **1** overlapped with that of **f**, the residual ratio of **1** was less than 18% after 1 h treatment with trypsin. B) The identified products by the digestion of **1** by chymotrypsin (upper, **a–c** in Fig. 6A) or trypsin (lower, **d–i** in Fig. S5A). \*\*: unidentified. A Tris-buffered solution (80 mM, pH 7.8) containing **1** or **3** (100  $\mu$ M) and chymotrypsin or trypsin (5  $\mu$ g/ml) was incubated at 37  $^{\circ}$ C, and analyzed by HPLC.
